# Supplementary material
Source: Springer Nature journal article supplement (https://www.springermedizin.de/resource/supplementary/12990_2010_306_MOESM8_ESM.pdf/9612994)

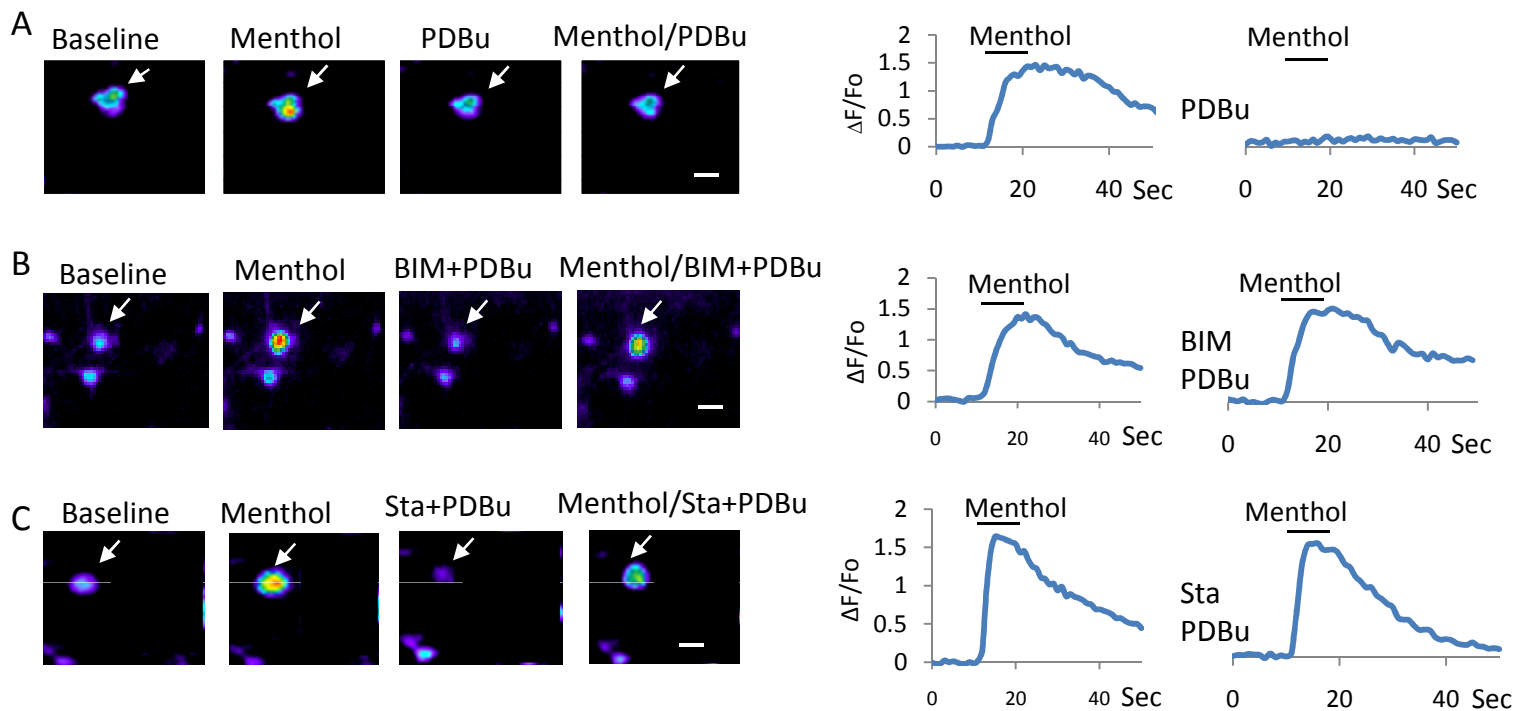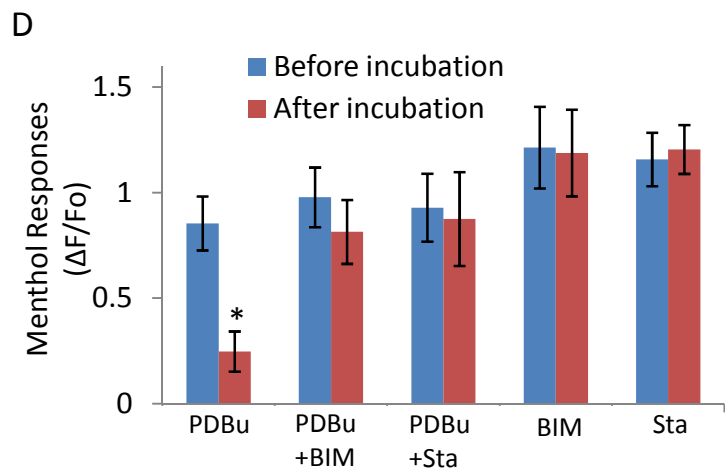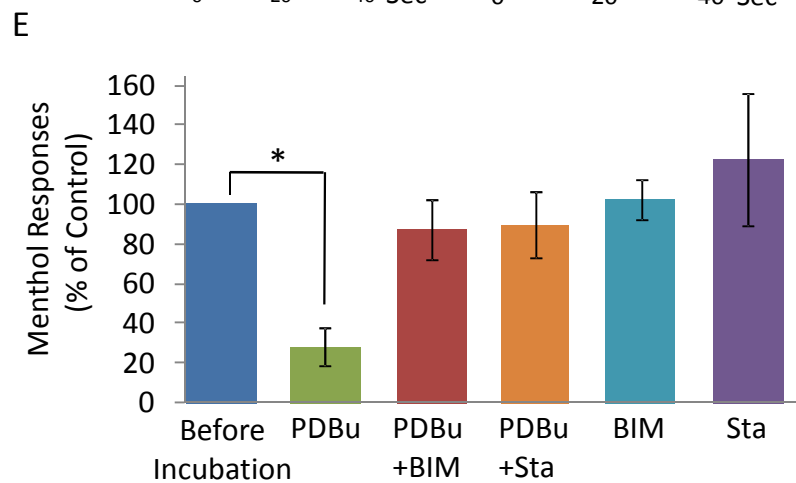

Supplement: MOESM8 [file 9612994]
